# Supplementary material for: Clinical significance of FBXO43 in hepatocellular carcinoma and its impact on tumor cell proliferation, migration and invasion
Source: PeerJ journal article supplement (doi:10.7717/peerj.15373), 2023-05-22
Supplement: RawDataFigure4BC.zip [file BEL-7404.xlsx]

## Sheet: Sheet1
1.Baseline：
cell line	BEL-7404
gene	FBXO43，Human
cell/well	2000
plate	96-well plate，100 μl/well
detection	24-120 h after inoculation
2.Group：
shCtrl	NC-shRNA lentivirus
shFBXO43	FBXO43-shRNA lentivirus
3.Result：
	Time(day)	shCtrl			shFBXO43
OD490	1	0.156	0.143	0.145	0.176	0.171	0.169
	2	0.288	0.298	0.321	0.256	0.201	0.231
	3	0.436	0.474	0.444	0.334	0.345	0.335
	4	0.657	0.646	0.624	0.384	0.382	0.393
	5	0.843	0.846	0.845	0.454	0.425	0.456
