# Supplementary material for: Clinical significance of FBXO43 in hepatocellular carcinoma and its impact on tumor cell proliferation, migration and invasion
Source: PeerJ journal article supplement (doi:10.7717/peerj.15373), 2023-05-22
Supplement: RawDataFigure4BC.zip [file SMMC-7721.xlsx]

## Sheet: Sheet1
1.Baseline：
cell line	SMMC-7721
gene	FBXO43，Human
cell/well	2000
plate	96-well plate，100 μl/well
detection	24-120 h after inoculation
2.Group：
shCtrl	NC-shRNA lentivirus
shFBXO43	FBXO43-shRNA lentivirus
3.Result：
	Time(day)	shCtrl			shFBXO43
OD490	1	0.134	0.136	0.145	0.135	0.123	0.126
	2	0.246	0.259	0.249	0.172	0.181	0.178
	3	0.439	0.457	0.449	0.219	0.206	0.197
	4	0.638	0.646	0.641	0.268	0.275	0.281
	5	0.737	0.729	0.758	0.393	0.394	0.396
