# Supplementary material for: Clinical significance of FBXO43 in hepatocellular carcinoma and its impact on tumor cell proliferation, migration and invasion
Source: PeerJ journal article supplement (doi:10.7717/peerj.15373), 2023-05-22
Supplement: RawDataFigure4DE.zip [file SMMC-7721.xlsx]

## Sheet: Sheet1
1.Baseline：
cell line	SMMC-7721
gene	FBXO43, human
cell/well	800
plate	6-well plate，2 ml/well
detection	incubation for 14 days
2.Group：
shCtrl	NC-shRNA lentivirus
shFBXO43	FBXO43-shRNA lentivirus
3.Result
group	shCtrl			shFBXO43
colony number	148	154	143	58	66	54
