# Supplementary material for: Clinical significance of FBXO43 in hepatocellular carcinoma and its impact on tumor cell proliferation, migration and invasion
Source: PeerJ journal article supplement (doi:10.7717/peerj.15373), 2023-05-22
Supplement: RawDataFigure5AB.zip [file BEL-scratch.xlsx]

## Sheet: scratch
1.Baseline：
cell line	BEL-7404
gene	FBXO43,human
cell/well	50000
plate	96-well plate，100 μl/well
detection	0、24、48h
2.Group：
shCtrl	NC-shRNA lentivirus
shFBXO43	FBXO43-shRNA lentivirus
3.Result
	Scratch width
	Time	shCtrl			shFBXO43
	0h	41	40.4	41.1	30.9	31.6	31.4
	24h	37	35.4	38.1	27.9	28	28.4
	48h	27.2	28.5	30.2	25.8	25.6	25.3
	invasion distance
	Time	shCtrl			shFBXO43
	24h	4	5	3	3	3.6	3
	48h	13.8	11.9	10.9	5.1	6	6.1
	invasion rate
	Time	shCtrl			shFBXO43
	24h	0.097561	0.123762	0.0729927	0.0970874	0.113924	0.0955414
	48h	0.336585	0.294554	0.265207	0.165049	0.189873	0.194268
