# Supplementary material for: Clinical significance of FBXO43 in hepatocellular carcinoma and its impact on tumor cell proliferation, migration and invasion
Source: PeerJ journal article supplement (doi:10.7717/peerj.15373), 2023-05-22
Supplement: RawDataFigure5AB.zip [file SMMC-scratch.xlsx]

## Sheet: scratch
1.Baseline：
cell line	SMMC-7721
gene	FBXO43,human
cell/well	50000
plate	96-well plate，100 μl/well
detection	0、24、48h
2.Group：
shCtrl	NC-shRNA lentivirus
shFBXO43	FBXO43-shRNA lentivirus
3.Result
	Scratch width
	Time	shCtrl			shFBXO43
	0h	30.1	29.8	30.8	30.3	30.8	31.9
	24h	21.6	21.9	22.6	25.2	23.8	27
	48h	16.2	16.8	17.6	22.9	22.4	23.7
	invasion distance
	Time	shCtrl			shFBXO43
	24h	8.5	7.9	8.2	5.1	7	4.9
	48h	13.9	13	13.2	7.4	8.4	8.2
	invasion rate
	Time	shCtrl			shFBXO43
	24h	0.282392	0.265101	0.266234	0.168317	0.227273	0.153605
	48h	0.461794	0.436242	0.428571	0.244224	0.272727	0.257053
