# Supplementary material for: Clinical significance of FBXO43 in hepatocellular carcinoma and its impact on tumor cell proliferation, migration and invasion
Source: PeerJ journal article supplement (doi:10.7717/peerj.15373), 2023-05-22
Supplement: RawDataFigure5CD.zip [file BEL-Transwell.xlsx]

## Sheet: Transwell
1.Baseline：
cell line	BEL-7404
gene	FBXO43,human
cell/well	80000
plate	24-well plate，transwell chamber 100 μl/well，well plate 600 μl/well
detection	24h
2.Group：
shCtrl	NC-shRNA lentivirus
shFBXO43	FBXO43-shRNA lentivirus
3.Result
	200X cell numer	shCtrl			shFBXO43
		1	2	3	1	2	3
	field 1	241	222	231	45	55	61
	field 2	231	217	240	49	51	49
	field 3	222	220	210	58	44	49
		231.333	219.667	227	50.6667	50	53
