# Supplementary material for: Clinical significance of FBXO43 in hepatocellular carcinoma and its impact on tumor cell proliferation, migration and invasion
Source: PeerJ journal article supplement (doi:10.7717/peerj.15373), 2023-05-22
Supplement: RawDataFigure5CD.zip [file SMMC-Transwell.xlsx]

## Sheet: Transwell
1.Baseline：
cell line	SMMC-7721
gene	FBXO43,human
cell/well	80000
plate	24-well plate，transwell chamber 100 μl/well，well plate 600 μl/well
detection	24h
2.Group：
shCtrl	NC-shRNA lentivirus
shFBXO43	FBXO43-shRNA lentivirus
3.Result
	200X cell numer	shCtrl			shFBXO43
		1	2	3	1	2	3
	field 1	367	375	357	159	144	166
	field 2	371	366	364	147	167	159
	field 3	359	358	358	165	158	152
		365.667	366.333	359.667	157	156.333	159
